# Supplementary material
Source: PubMed Central journal article supplement (PMC4426427)
Supplement: pnas.201423533SI.pdf [file pnas.201423533SI.pdf]

# Supporting Information

Huang et al. 10.1073/pnas.1423533112

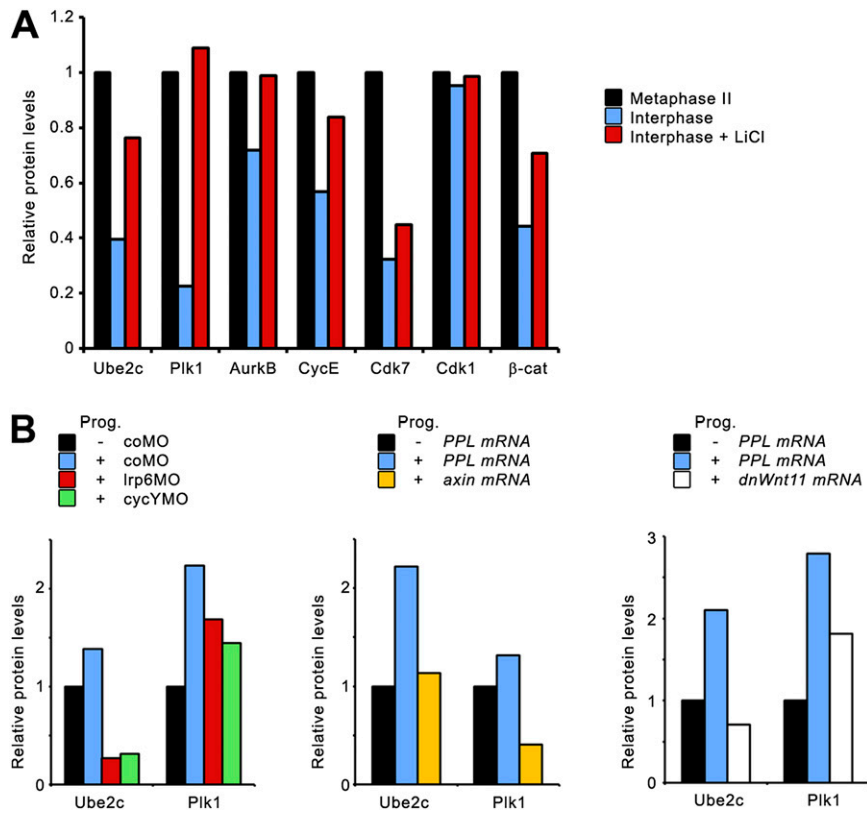

**Fig. S1.** Validation of Wnt/STOP targets in *Xenopus*. Quantification of the Western blots from Fig. 2D (A) and Fig. 2E (B). Protein levels were normalized to the loading control (ERK).

**Dataset S1.** Supplemental Excel tables containing the processed ProtoArray data of (i) the 3,873 proteins scored as polyUb positives and (ii) the top 864 LiCl hits with more than 1.8-fold down-regulation

[Dataset S1](#)
